# Supplementary material for: Facile synthesis of a molybdenum phosphide (MoP) nanocomposite Pt support for high performance methanol oxidation
Source: Royal Society of Chemistry journal article supplement (doi:10.1039/c7cy01835e), 2017-01-01
Supplement: c7cy01835e1.pdf [file c7cy01835e1.pdf]

## Supporting Information

### **Facile synthesis of a molybdenum phosphide (MoP) nanocomposite Pt support for high performance methanol oxidation**

Jinliang Zhu,<sup>\*a</sup> Shangli Huang,<sup>a</sup> Julian Key,<sup>a</sup> Shuangxi Nie,<sup>b</sup> Shaojian Ma<sup>\*a</sup> and Pei Kang Shen<sup>\*a</sup>

<sup>a</sup> Collaborative Innovation Center of Renewable Energy Materials, Guangxi Key Laboratory of Electrochemical Energy Materials, School of Chemistry and Chemical Engineering, Guangxi University, Nanning, 530004, PR China.

<sup>b</sup> Guangxi Key Laboratory of Clean Pulp & Papermaking and Pollution Control, Nanning 530004, PR China.

\* Corresponding authors. Tel.: +86 07713237990; jlzhu85@163.com (Jinliang Zhu); msj3503@sina.com (Shaojian Ma); stsspk@mail.sysu.edu.cn (Pei Kang Shen).

**Table S1. The synthesis methods of molybdenum phosphide reported in literatures**

| Molybdenum phosphide | Morphology          | Synthesis                                              | Phosphorus source and precursor                                                                                                       | Ref.     |
|----------------------|---------------------|--------------------------------------------------------|---------------------------------------------------------------------------------------------------------------------------------------|----------|
| MoP                  | Micro particle      | Solid state synthesis                                  | Red phosphorus + Mo                                                                                                                   | [1]      |
| MoP                  | Micro powder        | Solid state synthesis                                  | LiO <sub>3</sub> P + Mo                                                                                                               | [2]      |
| MoP                  | Particle            | Solid state synthesis                                  | Na <sub>3</sub> P <sub>3</sub> O <sub>9</sub> + Mo                                                                                    | [3]      |
| MoP                  | Particle            | Solid state synthesis (in H <sub>2</sub> )             | (NH <sub>4</sub> ) <sub>2</sub> HPO <sub>4</sub> (or NaH <sub>2</sub> PO <sub>2</sub> ) + MoO <sub>3</sub>                            | [4, 5]   |
| MoP                  | Bulk                | Hydrothermal synthesis                                 | (NH <sub>4</sub> ) <sub>2</sub> HPO <sub>4</sub> + (NH <sub>4</sub> ) <sub>6</sub> Mo <sub>7</sub> O <sub>24</sub> ·xH <sub>2</sub> O | [6-8]    |
| MoP                  | Bulk                | Calcination in air + reduction in H <sub>2</sub>       | (NH <sub>4</sub> ) <sub>2</sub> HPO <sub>4</sub> + (NH <sub>4</sub> ) <sub>6</sub> Mo <sub>7</sub> O <sub>24</sub> •4H <sub>2</sub> O | [9-14]   |
| MoP                  | Bulk                | Solid state synthesis (in H <sub>2</sub> )             | P <sub>2</sub> O <sub>5</sub> + (NH <sub>4</sub> ) <sub>6</sub> Mo <sub>7</sub> O <sub>24</sub> •4H <sub>2</sub> O                    | [15]     |
| MoP                  | Bulk                | Sintered + reduced in H <sub>2</sub>                   | (NH <sub>4</sub> ) <sub>2</sub> HPO <sub>4</sub> + (NH <sub>4</sub> ) <sub>6</sub> Mo <sub>7</sub> O <sub>24</sub> •4H <sub>2</sub> O | [16]     |
| MoP                  | Particle            | Hydrothermal synthesis + reduction in dimethyl ether   | (NH <sub>4</sub> ) <sub>2</sub> HPO <sub>4</sub> + (NH <sub>4</sub> ) <sub>6</sub> Mo <sub>7</sub> O <sub>24</sub> •4H <sub>2</sub> O | [17]     |
| MoP                  | Particle            | Thermal reduction by hydrogen plasma                   | P <sub>2</sub> O <sub>5</sub> + MoO <sub>3</sub>                                                                                      | [18, 19] |
| MoP                  | Nanoparticle        | Calcination in air + reduction in H <sub>2</sub>       | (NH <sub>4</sub> ) <sub>2</sub> HPO <sub>4</sub> + synthesized MoO <sub>2</sub> nanoparticles                                         | [20]     |
| MoP NA/CC            | Sheet               | Solid state synthesis                                  | Red phosphorus + synthesized MoS <sub>2</sub> NA/CC                                                                                   | [21]     |
| MoP                  | Bulk                | Solid state synthesis (in H <sub>2</sub> )             | NH <sub>4</sub> H <sub>2</sub> PO <sub>4</sub> + (NH <sub>4</sub> ) <sub>6</sub> Mo <sub>7</sub> O <sub>24</sub> •4H <sub>2</sub> O   | [22]     |
| MoP /SN              | Particle            | Hydrothermal synthesis + calcination in H <sub>2</sub> | H <sub>3</sub> PO <sub>4</sub> +H <sub>3</sub> PMo <sub>12</sub> O <sub>40</sub> •nH <sub>2</sub> O + (thio)urea                      | [23]     |
| MoP                  | Single crystal bulk | Solid-state reaction (Ge as the flux)                  | P + Mo                                                                                                                                | [24]     |

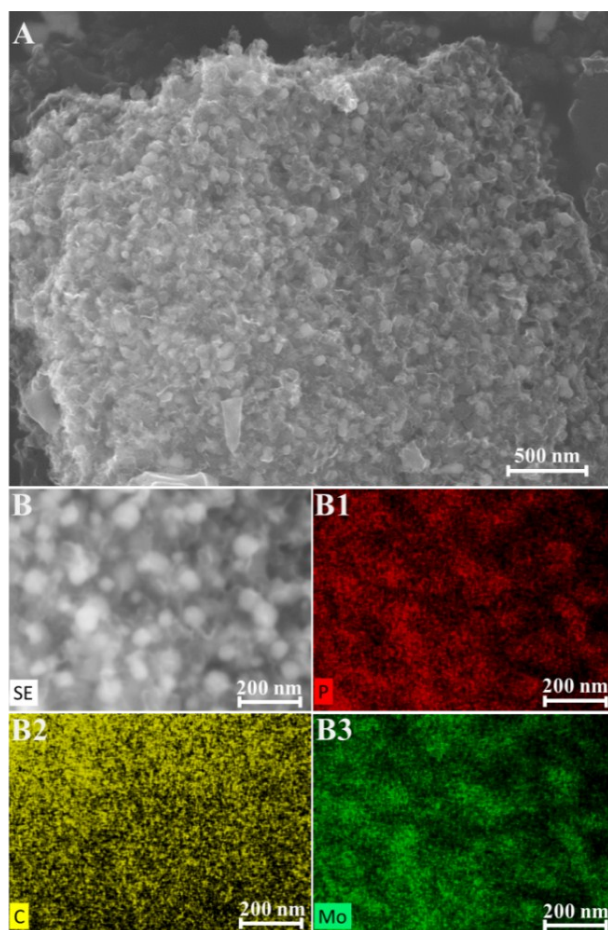

**Fig. S1** (A, B) SEM images of the MoP/C<sup>(2)</sup> and (B1-B3: P, C and Mo respectively) element mappings of the MoP/C<sup>(2)</sup>.

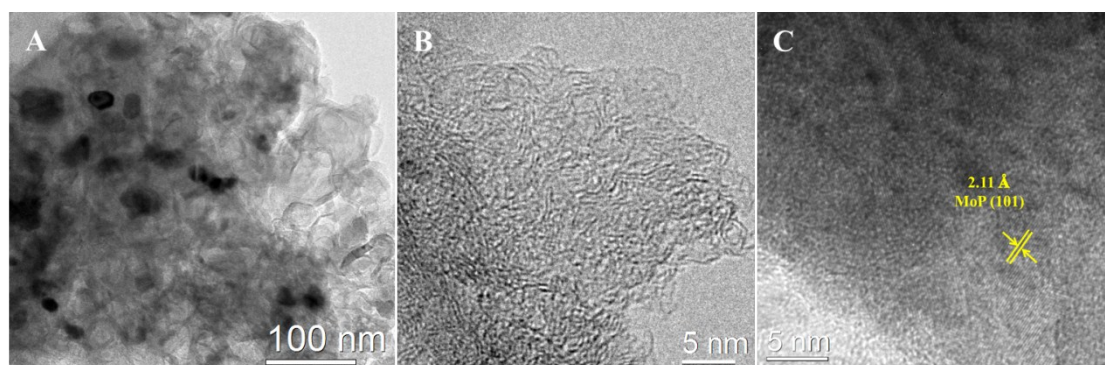

**Fig. S2** TEM and HRTEM images of MoP/C<sup>(2)</sup>

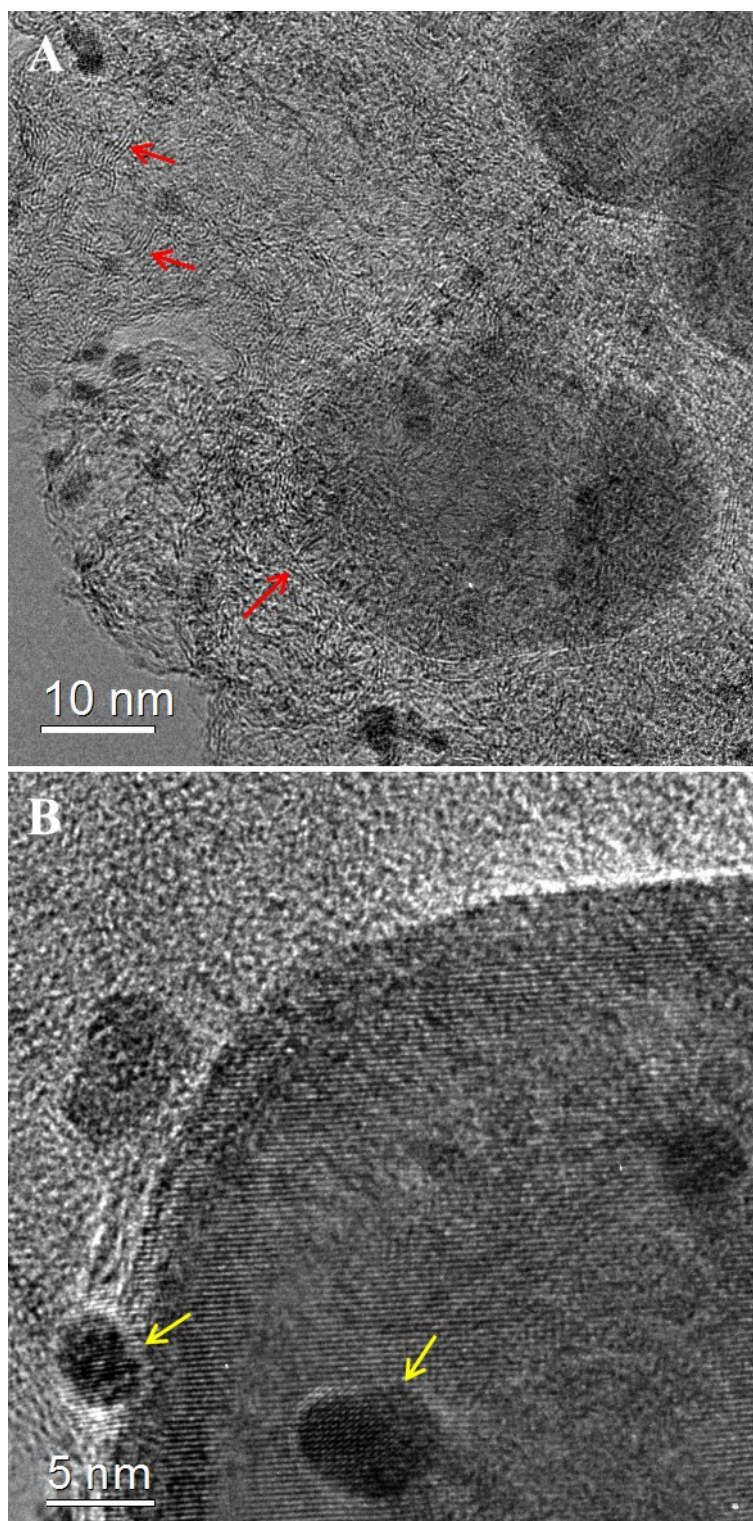

**Fig. S3** Enlarged TEM images of Pt-MoP/C<sup>(2)</sup>

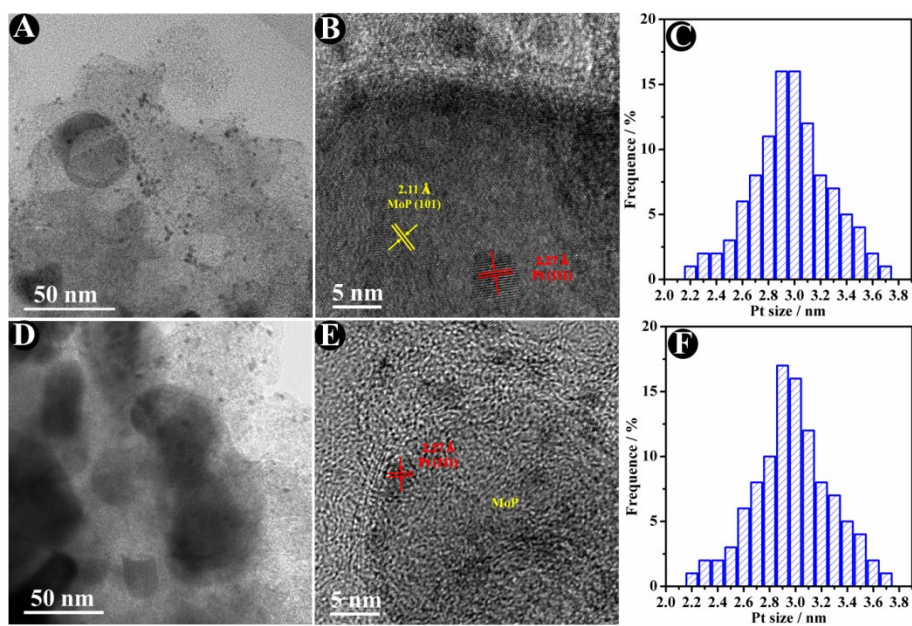

**Fig. S4** TEM and HRTEM images of (A, B) Pt-MoP/C<sup>(1)</sup> and (D, E) Pt-MoP/C<sup>(3)</sup>, size-distribution histogram of Pt nanoparticles on: (C) Pt-MoP/C<sup>(1)</sup> and (F) Pt-MoP/C<sup>(3)</sup>.

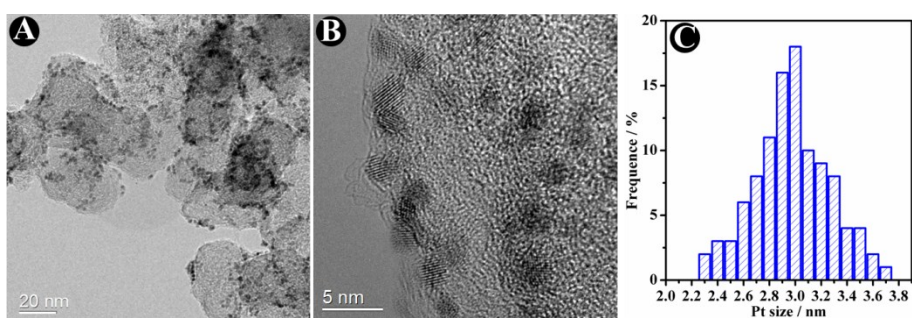

**Fig. S5** TEM (A) and HRTEM (B) images of Pt/C<sub>free</sub> and size-distribution histogram (C) of Pt nanoparticles on Pt/C<sub>free</sub>.

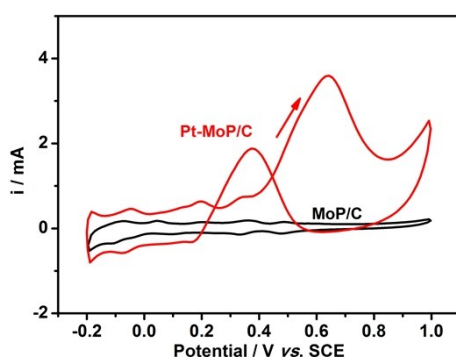

**Fig. S6** CVs of MoP/C and Pt-MoP/C<sup>(1)</sup> in 0.5 M H<sub>2</sub>SO<sub>4</sub> + 1.0 M CH<sub>3</sub>OH solution at 50 mV s<sup>-1</sup>.

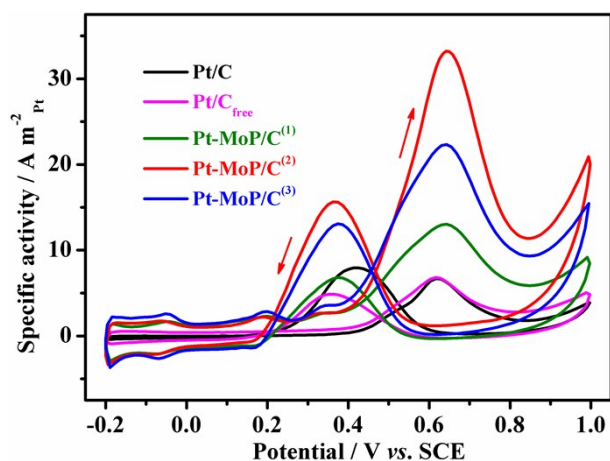

**Fig. S7** Specific activity of commercial Pt/C, Pt/C<sub>free</sub> and Pt-MoP/C catalysts illustrated by their cyclic voltammograms in 0.5 M H<sub>2</sub>SO<sub>4</sub> + 1.0 M CH<sub>3</sub>OH solution at 50 mV s<sup>-1</sup>.

**Table S2.** Electrocatalytically active surface areas (ECSAs) estimated from hydrogen absorption and specific activity of the catalysts

| Samples                 | ECSAs (m <sup>2</sup> g <sup>-1</sup> ) | Specific activity    |
|-------------------------|-----------------------------------------|----------------------|
|                         |                                         | (A m <sup>-2</sup> ) |
| Pt-MoP/C <sup>(1)</sup> | 55.21                                   | 13.04                |
| Pt-MoP/C <sup>(2)</sup> | 56.01                                   | 32.94                |
| Pt-MoP/C <sup>(3)</sup> | 55.58                                   | 22.33                |
| Pt/C <sub>free</sub>    | 54.87                                   | 6.79                 |
| Pt/C                    | 54.69                                   | 6.69                 |

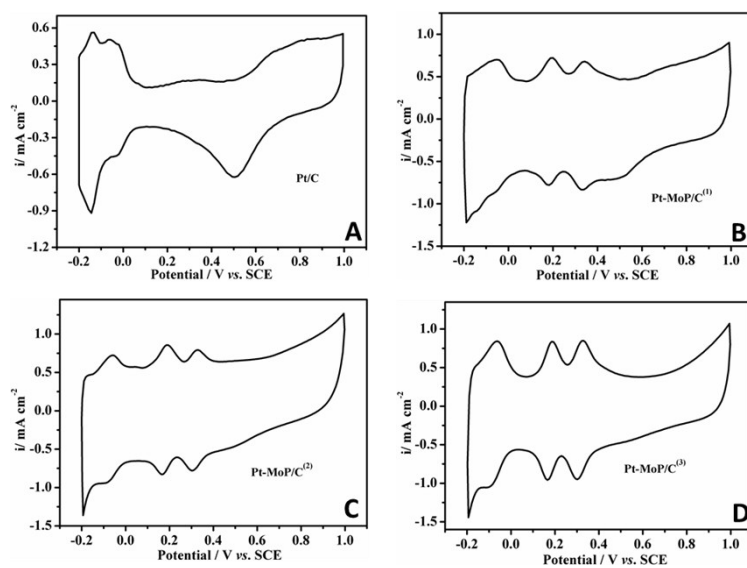

**Fig. S8** CVs of commercial Pt/C and Pt-MoP/C catalysts in 0.5 M H<sub>2</sub>SO<sub>4</sub> at 50 mV s<sup>-1</sup>.

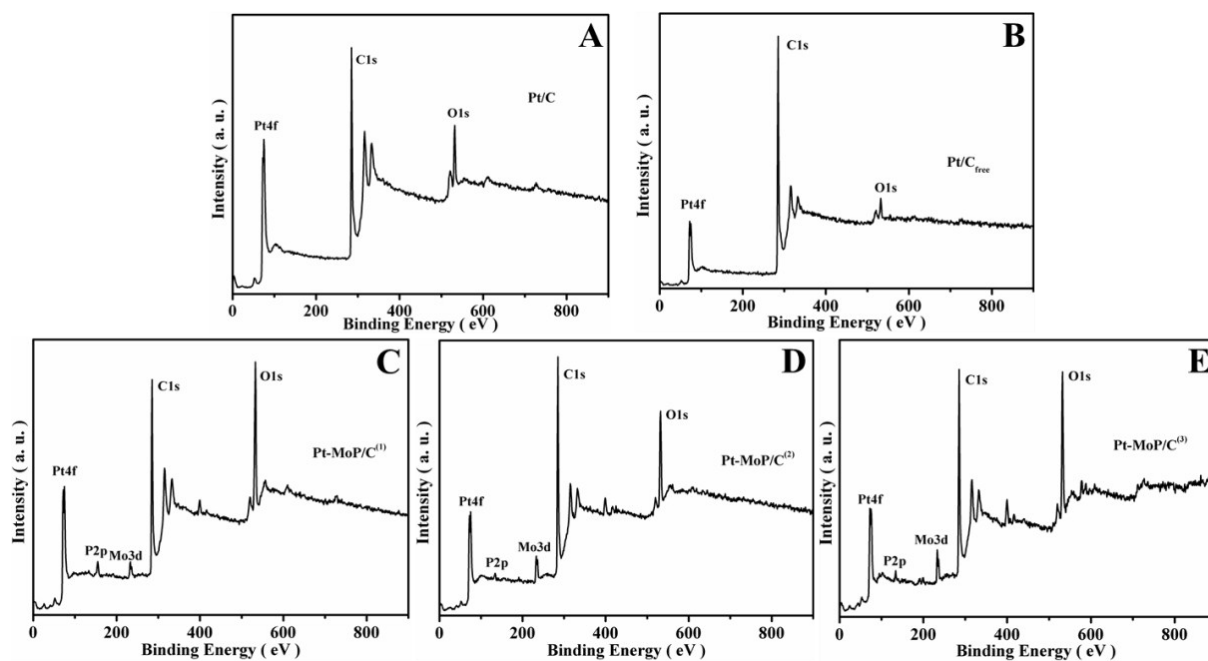

**Fig. S9** XPS spectra of the Pt/C, Pt/C<sub>free</sub> and Pt-MoP/C catalysts.

**Table S3.** XPS analysis of the samples (surface atomic ratios of the samples)

| Samples                 | Carbon (at.%) | Phosphorus (at.%) | Molybdenum (at.%) | Platinum (at.%) |
|-------------------------|---------------|-------------------|-------------------|-----------------|
| Pt-MoP/C <sup>(1)</sup> | 66.48         | 1.78              | 1.24              | 2.83            |
| Pt-MoP/C <sup>(2)</sup> | 74.39         | 1.84              | 1.35              | 2.24            |
| Pt-MoP/C <sup>(3)</sup> | 74.91         | 2.31              | 1.77              | 1.47            |
| Pt/C <sub>free</sub>    | 74.73         | 0.74              | ---               | 1.48            |
| Pt/C                    | 81.49         | ---               | ---               | 5.51            |

**Table S4.** Electrochemical Parameters of methanol electrooxidation catalysts

| Catalysts                                                             | Potential shift <sup>†</sup> | $I_f/I_b$ | Activity ratio <sup>‡</sup> | Test conditions                                                |
|-----------------------------------------------------------------------|------------------------------|-----------|-----------------------------|----------------------------------------------------------------|
| PtNi/CNT <sup>[25]</sup>                                              | ---                          | 1.1       | 1.4                         | 1 M CH <sub>3</sub> OH/0.5 M H <sub>2</sub> SO <sub>4</sub>    |
| Pt <sub>3</sub> V/C <sup>[26]</sup>                                   | -100 mV                      | --        | ---                         | 0.1 M HClO <sub>4</sub> +1 M CH <sub>3</sub> OH                |
| Nanoporous Pt–Cu microwires <sup>[27]</sup>                           | ---                          | 1.58      | 1.6                         | 0.5 M H <sub>2</sub> SO <sub>4</sub> +1.0 M CH <sub>3</sub> OH |
| Pd–Pt alloy <sup>[28]</sup>                                           | ---                          | 1.60      | 2.0                         | 0.5 M H <sub>2</sub> SO <sub>4</sub> +1.0 M CH <sub>3</sub> OH |
| Pt/S-RGO <sup>[29]</sup>                                              | ---                          | 1.36      | 1.8                         | 0.5 M H <sub>2</sub> SO <sub>4</sub> +2.0 M CH <sub>3</sub> OH |
| Pt-Co <sub>2</sub> P/C <sup>[30]</sup>                                | -120 mV                      | 1.19      | ---                         | 0.5 M H <sub>2</sub> SO <sub>4</sub> +1.0 M CH <sub>3</sub> OH |
| Pt/Ti <sub>0.7</sub> Ru <sub>0.3</sub> O <sub>2</sub> <sup>[31]</sup> | -100 mV                      | ---       | ---                         | 0.1 M H <sub>2</sub> SO <sub>4</sub> +0.5 M CH <sub>3</sub> OH |
| Pt/Ru <sup>[31]</sup>                                                 | -100 mV                      | ---       | ---                         |                                                                |
| np-PtCuTi <sup>[32]</sup>                                             | quite similar                | 1.36      | 4.2                         | 0.5 M H <sub>2</sub> SO <sub>4</sub> +0.5 M CH <sub>3</sub> OH |
| Ru@Pt <sup>[33]</sup>                                                 | -120 mV                      | ---       | 2.72                        | 0.5 M H <sub>2</sub> SO <sub>4</sub> +1.0 M CH <sub>3</sub> OH |
| Pt <sub>3.5</sub> Pb NNWs <sup>[34]</sup>                             | ---                          | 1.18      | 3.45                        | 0.5 M H <sub>2</sub> SO <sub>4</sub> +1.0 M CH <sub>3</sub> OH |
| Pt/NOMC-3D <sup>[35]</sup>                                            | -50 mV                       | 1.1       | 1.22                        | 0.5 M CH <sub>3</sub> OH+0.1 M HClO <sub>4</sub>               |
| PtZn/MWNT-E <sup>[36]</sup>                                           | ---                          | 1.46      | 1.4                         | 0.5 M H <sub>2</sub> SO <sub>4</sub> +1.0 M CH <sub>3</sub> OH |
| This work<br>(Pt-MoP/C)                                               | -140 mV                      | 2.1       | 5.1                         | 0.5 M H <sub>2</sub> SO <sub>4</sub> +1.0 M CH <sub>3</sub> OH |

Potential shift<sup>†</sup> is the onset peak potential shift of a catalyst compared with that of Pt/C in CH<sub>3</sub>OH oxidation.

Activity ratio<sup>‡</sup> is the peak mass activity ratio of a catalyst to that of Pt/C.

$I_f/I_b$  is the ratio of the forward peak current density ( $I_f$ ) to the backward peak current density ( $I_b$ ).

--- denotes no data mentioned in the references.

Compared with the latest reported Pt-based catalysts<sup>[25-30, 32-36]</sup>, the Pt-MoP/C in this work shows the biggest  $I_f/I_b$  and peak mass activity ratio. The onset peak potential of Pt-MoP/C toward methanol oxidation is 140 mV more negative than that of Pt/C, which is also superior to that of reported Pt/Ti<sub>0.7</sub>Ru<sub>0.3</sub>O<sub>2</sub><sup>[31]</sup>, Ru@Pt<sup>[33]</sup> and the state-of-the-art catalyst (Pt/Ru)<sup>[31]</sup>.



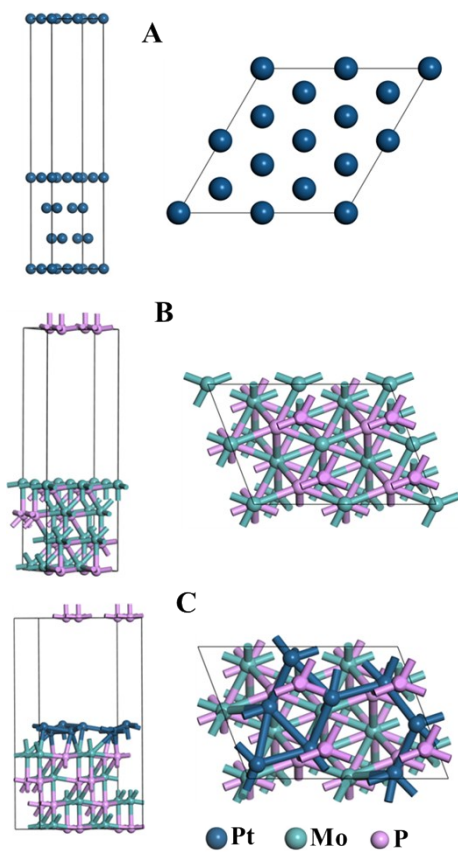

**Fig. S10** Side and top views of (A) Pt(111), (b) MoP(101) and (c) Pt(111)<sub>1ML</sub>-MoP(101).

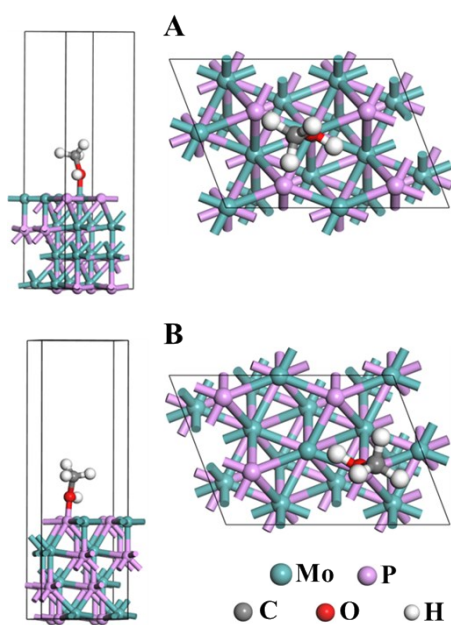

**Fig. S11** Side and top views of (A) MoP(101)-CH<sub>3</sub>OH-T1 and (B) MoP(101)-CH<sub>3</sub>OH-T2.

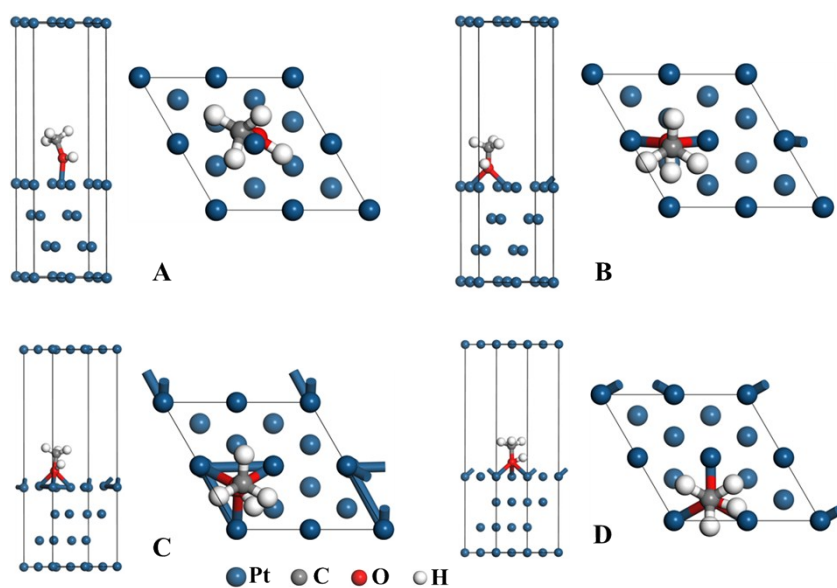

**Fig. S12** Side and top views of (A) Pt(111)-CH<sub>3</sub>OH-T, (B) Pt(111)-CH<sub>3</sub>OH-B, (C) Pt(111)-CH<sub>3</sub>OH-H and (d) Pt(111)-CH<sub>3</sub>OH-F.

**Table S5.** Computed adsorption energies ( $E_{\text{ads}}$ , eV) per molecule and structural parameters ( $d$ , Å) of methanol on MoP(101), Pt(111) and Pt(111)<sub>IML</sub>-MoP(101)

|                                  | $E_{\text{ads}}$ | $d(\text{O-Mo})$ | $d(\text{O-P})$ | $d(\text{O-Pt})$       | $d(\text{C-O})$ | $d(\text{H-O})$ |
|----------------------------------|------------------|------------------|-----------------|------------------------|-----------------|-----------------|
| MoP(101)-T1                      | -0.651           | 2.308            |                 |                        | 1.447           | 0.976           |
| MoP(101)-T2                      | -0.651           |                  | 3.516           |                        | 1.430           | 0.979           |
| Pt(111)-T                        | -0.186           |                  |                 | 2.308                  | 1.510           | 1.110           |
| Pt(111)-B                        | -0.079           |                  |                 | 3.158, 3.233           | 1.431           | 0.978           |
| Pt(111)-H                        | -0.151           |                  |                 | 3.202, 3.559,<br>4.001 | 1.430           | 0.981           |
| Pt(111)-F                        | -0.150           |                  |                 | 3.190, 3.206,<br>3.526 | 1.431           | 0.978           |
| Pt(111) <sub>IML</sub> -MoP(101) | -0.267           |                  |                 | 2.574                  | 1.442           | 0.978           |

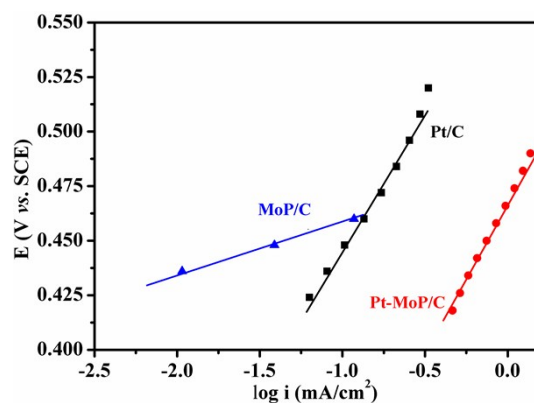

**Fig. S13** Tafel plots for the MoP/C, Pt/C and Pt-MoP/C<sup>(2)</sup> catalysts in 0.5 M H<sub>2</sub>SO<sub>4</sub> + 1.0 M CH<sub>3</sub>OH solution at 5 mV s<sup>-1</sup>.

## References

- [1] F. E. Faller and W. Biltz, *Zeitschrift für anorganische und allgemeine Chemie*, 1941, **248**, 209-228.
- [2] V. V. Lesnyak, D. A. Stratiichuk, V. S. Sudavtsova and M. S. Slobodyanik, *Russian Journal of Applied Chemistry*, 2001, **74**, 1274-1277.
- [3] A. B. Aueshov, L. V. Levchenko, S. Z. Eskibaeva, E. S. Shustikova and V. A. Sinyaev, *Inorganic Materials*, 2000, **36**, 935-937.
- [4] Z. Yao, Z. Lai, X. Zhang, F. Peng, H. Yu and H. Wang, *Materials Research Bulletin*, 2011, **46**, 1938-1941.
- [5] Q. Guan and W. Li, *Journal of Catalysis*, 2010, **271**, 413-415.
- [6] J. Bai, X. Li, A. Wang, R. Prins and Y. Wang, *Journal of Catalysis*, 2012, **287**, 161-169.
- [7] Z. W. Yao, L. Wang and H. Dong, *J Alloy Compd*, 2009, **473**, L10-L12.
- [8] P. A. Clark and S. T. Oyama, *Journal of Catalysis*, 2003, **218**, 78-87.
- [9] R. Cheng, Y. Shu, M. Zheng, L. Li, J. Sun, X. Wang and T. Zhang, *Journal of Catalysis*, 2007, **249**, 397-400.
- [10] C. Stinner, R. Prins and T. Weber, *Journal of Catalysis*, 2000, **191**, 438-444.
- [11] Z. Wu, F. Sun, W. Wu, Z. Feng, C. Liang, Z. Wei and C. Li, *Journal of Catalysis*, 2004, **222**, 41-52.
- [12] Z. Xing, Q. Liu, A. M. Asiri and X. Sun, *Advanced materials*, 2014, **26**, 5702-5707.
- [13] Y. Duan, Y. Sun, L. Wang, Y. Dai, B. Chen, S. Pan and J. Zou, *Journal of Materials Chemistry A*, 2016, **4**, 7674-7682.
- [14] Z. Yao, Y. Su, C. Lu, C. Yang, Z. Xu, J. Zhu, X. Zhuang and F. Zhang, *New Journal of Chemistry*, 2016, **40**, 6015-6021.
- [15] L. Guo, Y. Zhao and Z. Yao, *Dalton T*, 2016, **45**, 1225-1232.

- [16] C. Deng, F. Ding, X. Li, Y. Guo, W. Ni, H. Yan, K. Sun and Y.-M. Yan, *Journal of Materials Chemistry A*, 2016, **4**, 59-66.
- [17] Z. Yao, M. Li, X. Wang, X. Qiao, J. Zhu, Y. Zhao, G. Wang, J. Yin and H. Wang, *Dalton T*, 2015, **44**, 5503-5509.
- [18] J. Guan, Y. Wang, M. Qin, Y. Yang, X. Li and A. Wang, *Journal of Solid State Chemistry*, 2009, **182**, 1550-1555.
- [19] A. Wang, M. Qin, J. Guan, L. Wang, H. Guo, X. Li, Y. Wang, R. Prins and Y. Hu, *Angewandte Chemie International Edition*, 2008, **47**, 6052-6054.
- [20] J. Yang, F. Zhang, X. Wang, D. He, G. Wu, Q. Yang, X. Hong, Y. Wu and Y. Li, *Angewandte Chemie*, 2016, **128**, 13046-13050.
- [21] Z. Pu, S. Wei, Z. Chen and S. Mu, *Applied Catalysis B: Environmental*, 2016, **196**, 193-198.
- [22] S.-L. Fang, T.-C. Chou, S. Samireddi, K.-H. Chen, L.-C. Chen and W.-F. Chen, *Open Science*, 2017, **4**, 161016.
- [23] M. A. R. Anjum and J. S. Lee, *ACS Catalysis*, 2017, **7**, 3030-3038.
- [24] B. Lv, Z.-L. Feng, Q.-N. Xu, X. Gao, J.-Z. Ma, L.-Y. Kong, P. Richard, Y.-B. Huang, V. Strocov and C. Fang, *Nature*, 2017, **546**, 627-631.
- [25] A. B. A. A. Nassr, I. Sinev, M.-M. Pohl, W. Grünert and M. Bron, *Acs Catal*, 2014, **4**, 2449-2462.
- [26] Z. Cui, H. Chen, M. Zhao, D. Marshall, Y. Yu, H. Abruña and F. J. DiSalvo, *J Am Chem Soc*, 2014, **136**, 10206-10209.
- [27] H.-J. Qiu, X. Shen, J. Wang, A. Hirata, T. Fujita, Y. Wang and M. Chen, *Acs Catal*, 2015, **5**, 3779-3785.
- [28] G. Zhang, C. Huang, R. Qin, Z. Shao, D. An, W. Zhang and Y. Wang, *J Mater Chem A*, 2015, **3**, 5204-5211.
- [29] Y. Noh, Y. Kim, S. Lee, E. J. Lim, J. G. Kim, S. M. Choi, M. H. Seo and W. B. Kim, *Nanoscale*, 2015, **7**, 9438-9442.
- [30] J. Zhu, G. He and P. K. Shen, *J Power Sources*, 2015, **275**, 279-283.
- [31] M. Obradović, U. Lačnjevac, B. Babić, P. Ercius, V. Radmilović, N. Krstajić and S. L. Gojković, *Applied Catalysis B: Environmental*, 2015, **170**, 144-152.
- [32] Y. Wang, K. Yin, J. Zhang, C. Si, X. Chen, L. Lv, W. Ma, H. Gao and Z. Zhang, *Journal of Materials Chemistry A*, 2016, **4**, 14657-14668.
- [33] J. Xie, Q. Zhang, L. Gu, S. Xu, P. Wang, J. Liu, Y. Ding, Y. F. Yao, C. Nan and M. Zhao, *Nano Energy*, 2016, **21**, 247-257.
- [34] L. Huang, Y. Han, X. Zhang, Y. Fang and S. Dong, *Nanoscale*, 2017, **9**, 201-207.
- [35] G.-f. Long, X.-h. Li, K. Wan, Z.-x. Liang, J.-h. Piao and P. Tsiakaras, *Applied Catalysis B: Environmental*, 2017, **203**, 541-548.
- [36] Z. Qi, C. Xiao, C. Liu, T. W. Goh, L. Zhou, R. Maligal-Ganesh, Y. Pei, X. Li, L. A. Curtiss and W. Huang, *Journal of the American Chemical Society*, 2017, **139**, 4762-4768.
